# Supplementary material
Source: publisher figshare collection journal article supplement (https://diabetesjournals.figshare.com/articles/dataset/_/11996421)
Supplement: Supplementary file 1 [file 2]

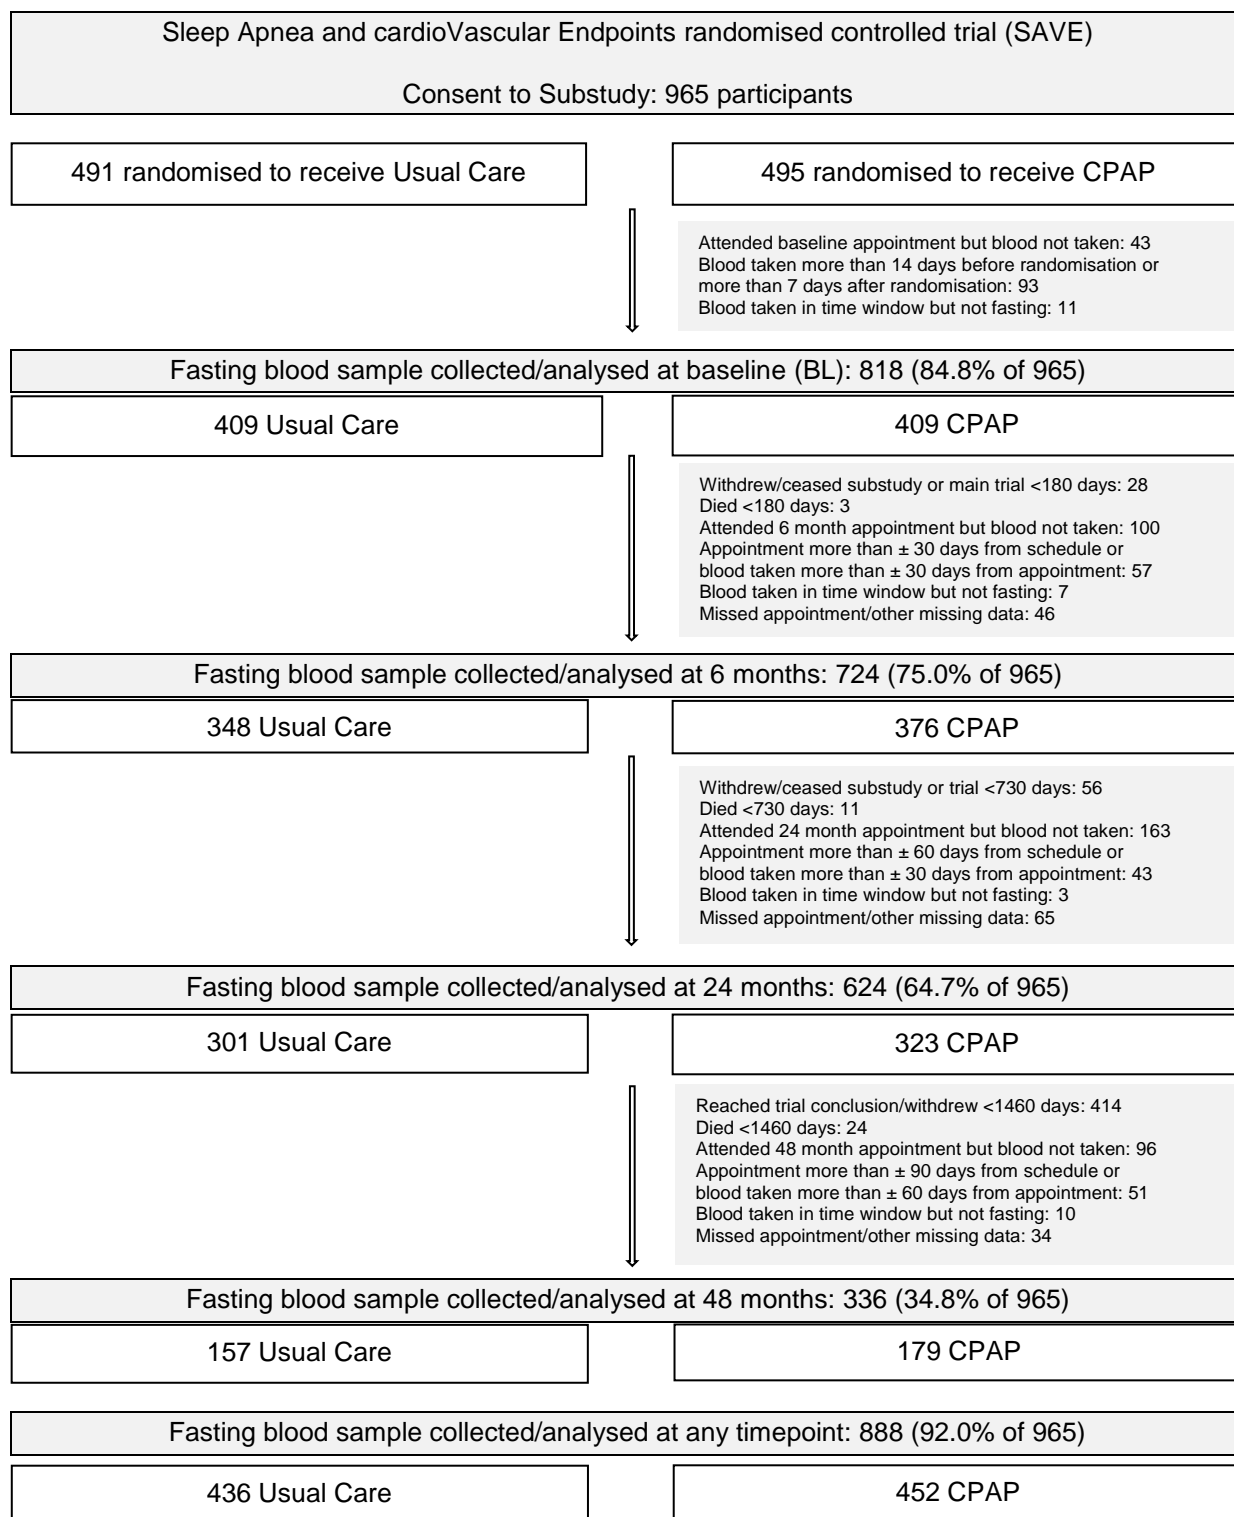

**Figure S1:**

Flowchart depicting participant and sample numbers in this substudy, with reasons for exclusion and missing data where available.

**Table S1:** Characteristics of 965 participants who consented to both main trial and substudy, were randomised in the main trial, but did/did not have blood included in analysis.

|                                                     |                      | No eligible blood in substudy<br>(n = 77) |            | Blood included in substudy<br>(n = 888) |            |
|-----------------------------------------------------|----------------------|-------------------------------------------|------------|-----------------------------------------|------------|
|                                                     |                      | Count                                     | Column N % | Count                                   | Column N % |
| Gender                                              | Female               | 16                                        | 20.8%      | 151                                     | 17.0%      |
|                                                     | Male                 | 61                                        | 79.2%      | 737                                     | 83.0%      |
| Country                                             | Australia            | 8                                         | 10.4%      | 173                                     | 19.5%      |
|                                                     | Brazil               | 2                                         | 2.6%       | 182                                     | 20.5%      |
|                                                     | China                | 60                                        | 77.9%      | 448                                     | 50.5%      |
|                                                     | New Zealand          | 6                                         | 7.8%       | 85                                      | 9.6%       |
|                                                     | Spain                | 1                                         | 1.3%       | 0                                       | 0.0%       |
|                                                     |                      |                                           |            |                                         |            |
| Age group at randomization                          | >60 years            | 38                                        | 49.4%      | 529                                     | 59.6%      |
|                                                     | ≤60 years            | 39                                        | 50.6%      | 359                                     | 40.4%      |
| OSA severity (ODI category from baseline ApneaLink) | 12-20                | 24                                        | 31.2%      | 361                                     | 40.7%      |
|                                                     | >20-30               | 18                                        | 23.4%      | 235                                     | 26.5%      |
|                                                     | >30                  | 35                                        | 45.5%      | 292                                     | 32.9%      |
| Daytime sleepiness (ESS at baseline)                | 0-10                 | 59                                        | 76.6%      | 636                                     | 71.6%      |
|                                                     | 11-15                | 18                                        | 23.4%      | 252                                     | 28.4%      |
| Obesity (BMI at baseline, kg/m <sup>2</sup> )       | ≥30                  | 15                                        | 20.0%      | 350                                     | 39.5%      |
|                                                     | <30                  | 60                                        | 80.0%      | 537                                     | 60.5%      |
| Cardiovascular disease history at baseline          | Cardiac only         | 36                                        | 46.8%      | 584                                     | 65.8%      |
|                                                     | Cerebrovascular only | 41                                        | 53.2%      | 263                                     | 29.6%      |
|                                                     | Both                 | 0                                         | 0.0%       | 41                                      | 4.6%       |
| Diabetes at baseline                                |                      | 12                                        | 16.0%      | 274                                     | 30.9%      |

OSA = obstructive sleep apnoea; ODI = oxygen desaturation index, events/hour; ESS = Epworth Sleepiness Scale score; BMI = body mass index.

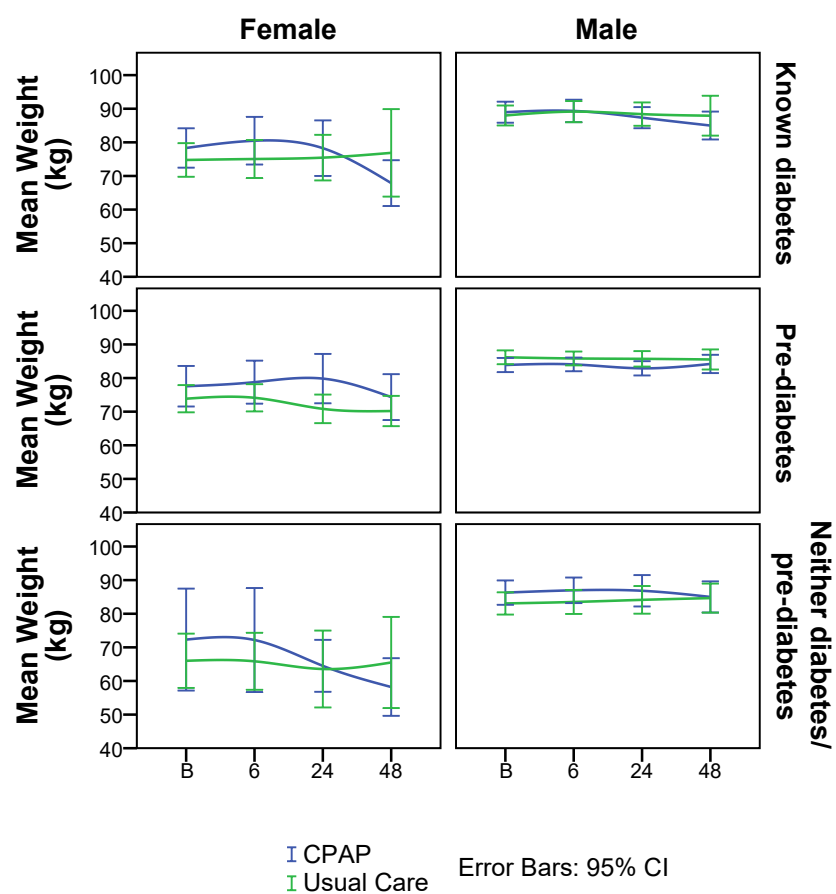

**Figure S2:**

Weight (kg) in CPAP (blue) and Usual Care (green) treatment groups. Observed mean and 95% CI from all available observations.

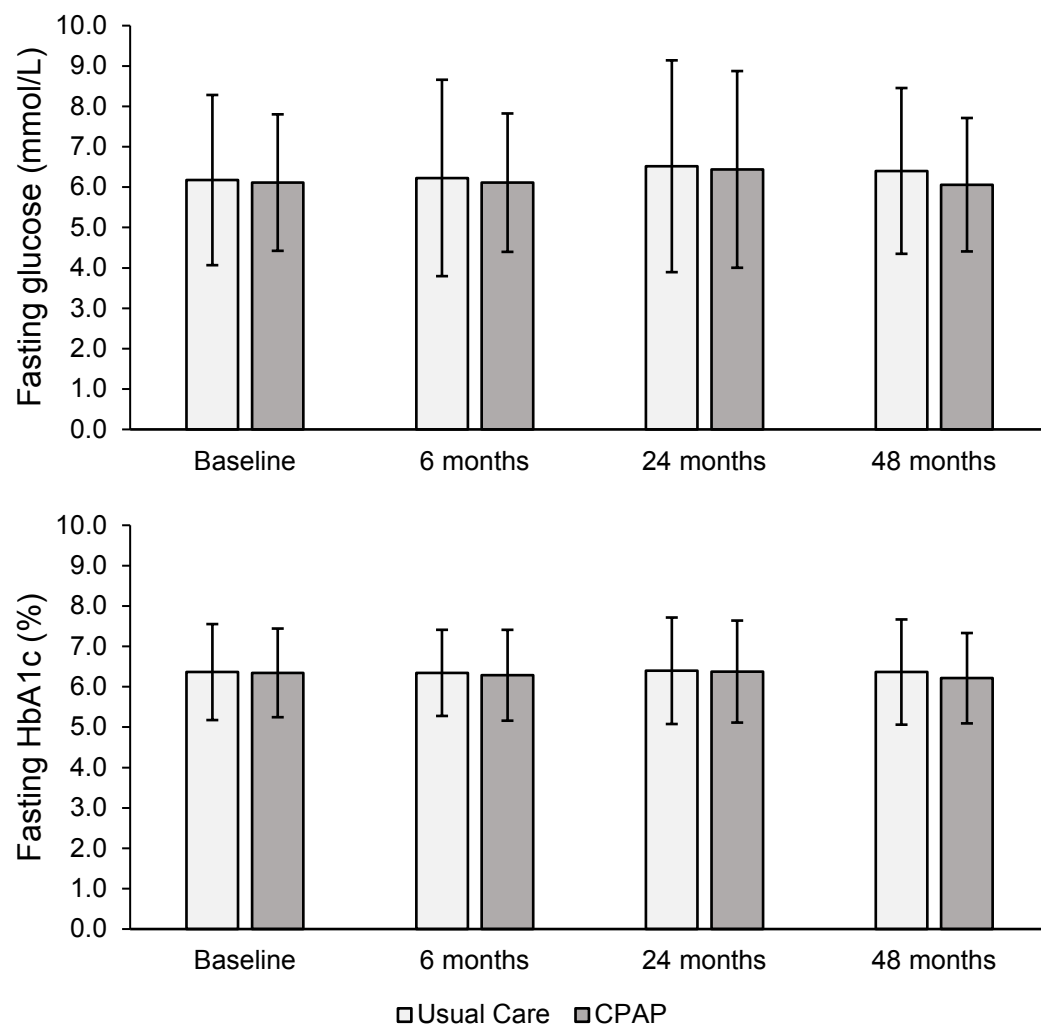

**Figure S3:**

Fasting serum glucose and HbA1c in CPAP (dark grey) and Usual Care (light grey) treatment groups. Observed mean and standard deviation from all available observations.

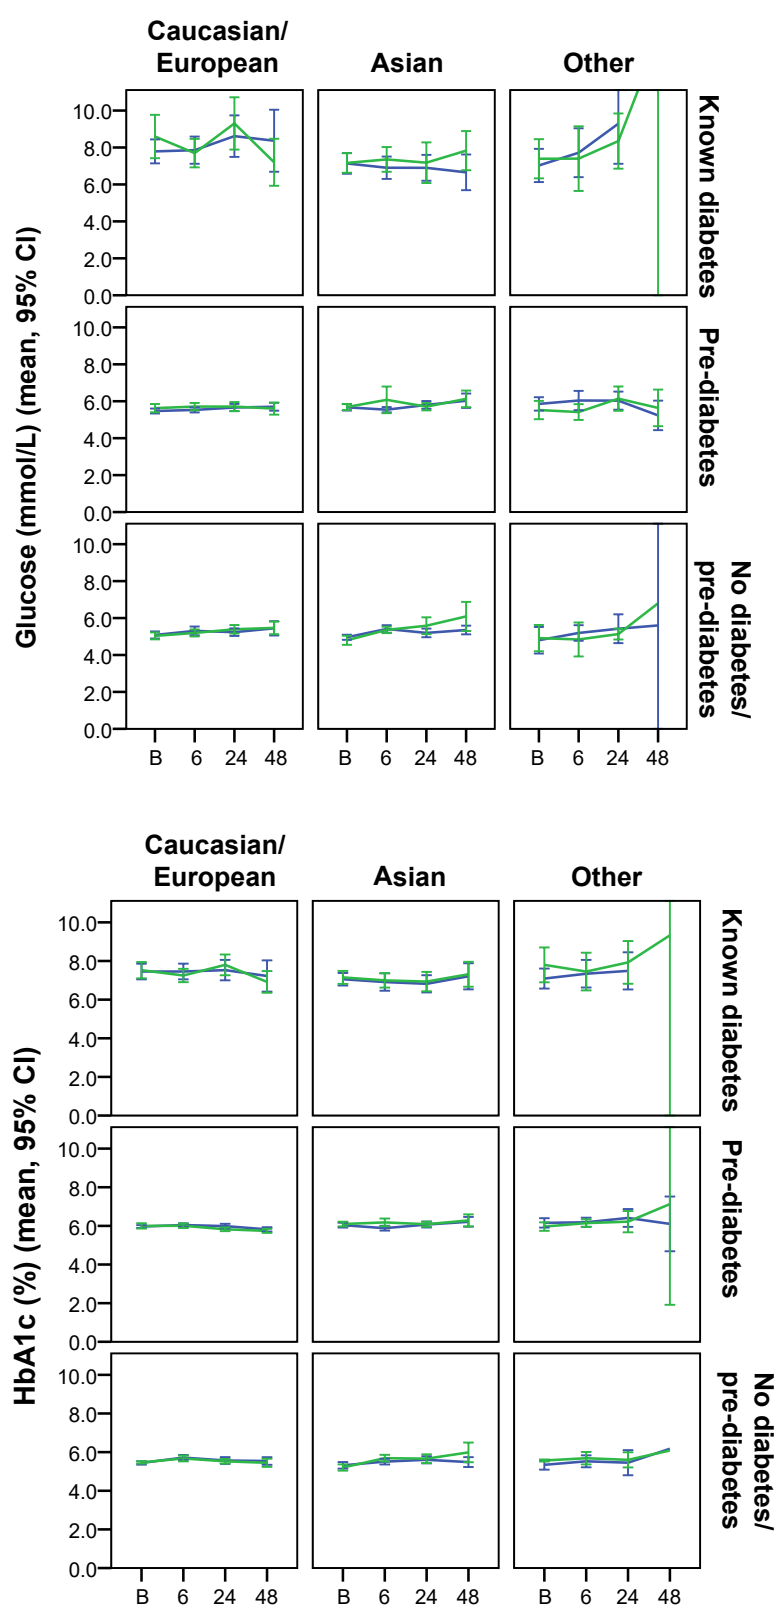

**Figure S4a:**

Fasting serum glucose and HbA1c in CPAP (blue) and Usual Care (green) treatment groups according to baseline diabetes status and self-reported race/ethnicity.

Estimated marginal means and 95% confidence intervals from linear mixed models. Due to small numbers of participants remaining, the error bars in the "Other" race/ethnicity group at 48 months are very large, extending beyond the scale of the figure, and for simplicity have been omitted from the plot showing HbA1c. X axis represents the timecourse of analysis, B = baseline, 6, 24 and 48 months.

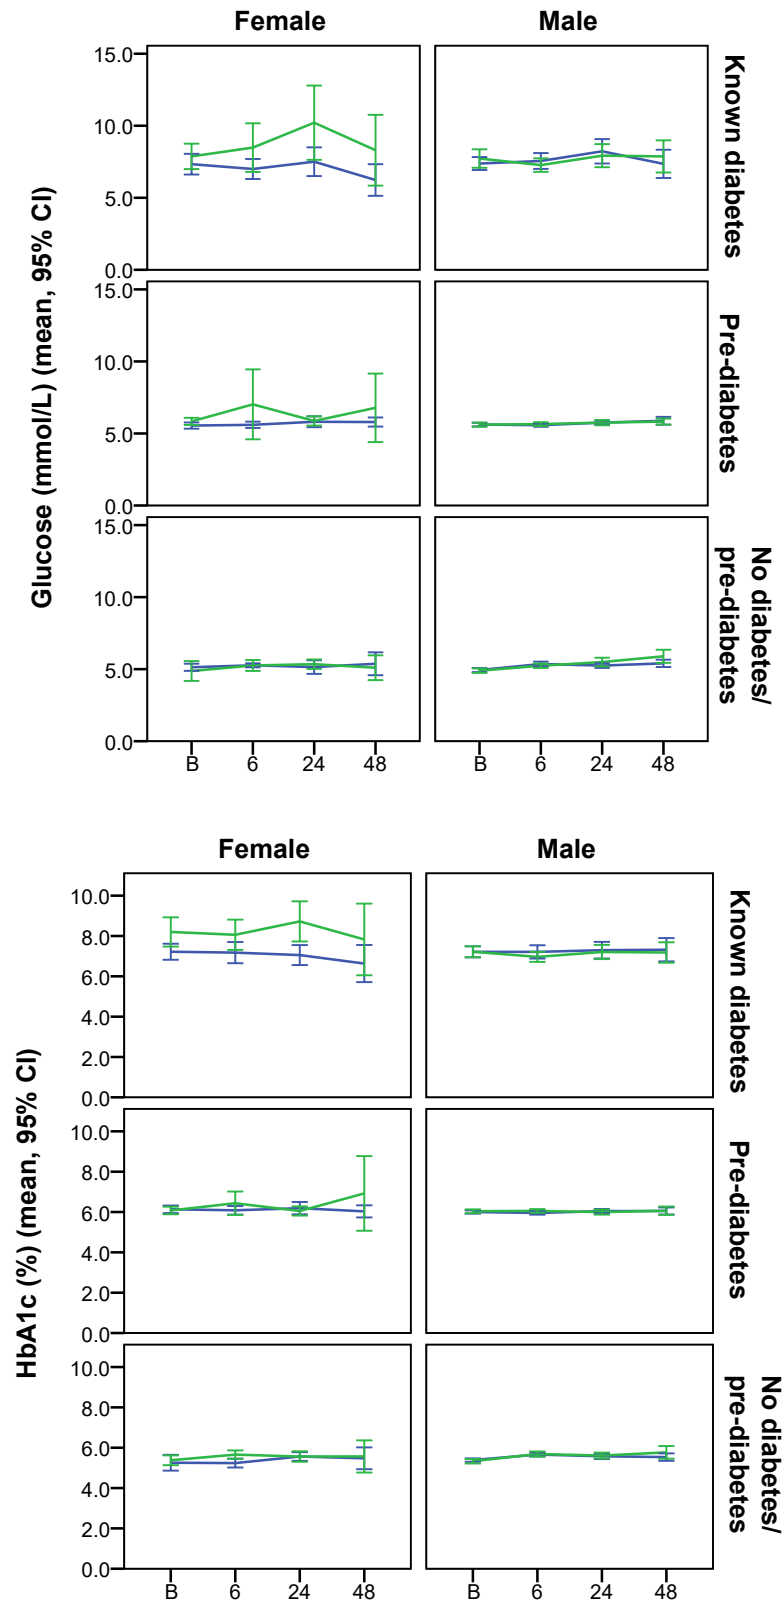

**Figure S4b:**

Fasting serum glucose and HbA1c in CPAP (blue) and Usual Care (green) treatment groups according to baseline diabetes status and sex. Estimated marginal means and 95% confidence intervals from linear mixed models. X axis represents the timecourse of analysis, B = baseline, 6, 24 and 48 months.

**Supplementary Table S2: Medications**

|                                               |                      | <b>Usual Care</b> | <b>CPAP</b> | <i>P</i> -value* |
|-----------------------------------------------|----------------------|-------------------|-------------|------------------|
|                                               |                      | Count (%)         | Count (%)   |                  |
| Insulin                                       | Baseline             | 40 (31.3%)        | 24 (16.4%)  | 0.004            |
|                                               | Started during study | 6 (4.7%)          | 10 (6.8%)   | 0.446            |
|                                               | End of study         | 44 (34.4%)        | 34 (23.3%)  | 0.042            |
| Oral anti-diabetic medications                | Baseline             | 98 (76.6%)        | 110 (75.3%) | 0.814            |
|                                               | Started during study | 9 (7.0%)          | 10 (6.8%)   | 0.953            |
|                                               | End of study         | 103 (80.5%)       | 117 (80.1%) | 0.945            |
|                                               |                      | Mean ± SD         | Mean ± SD   |                  |
| Oral anti-diabetic medications: change in DDD |                      | -58 ± 558         | -16 ± 352   | 0.944            |

\*Between group comparisons of count values by Pearson Chi Square test. Between group comparison of change in daily dose by Mann Whitney U test.

DDD = defined daily dose

**Supplementary Table S3a:** Fasting serum glucose according to treatment allocation. Only participants who had fasting blood collected at all three time points: baseline, 6 and 24 months.

| <i>Known diabetes at baseline</i>                    | Usual Care    |              |     | CPAP          |              |     | <i>Adjusted mean difference<br/>CPAP – Usual<br/>Care (95% CI)</i> | <i>P-value</i>       |                   |
|------------------------------------------------------|---------------|--------------|-----|---------------|--------------|-----|--------------------------------------------------------------------|----------------------|-------------------|
|                                                      | Mean          | 95% CI       | n   | Mean          | 95% CI       | n   |                                                                    | Treatment allocation | Treatment * visit |
| Baseline                                             | 7.66          | (7.21, 8.12) | 78  | 7.52          | (7.08, 7.95) | 87  | 0.113<br>(-0.253, 0.479)                                           | 0.544                | 0.606             |
| 6 months                                             | 7.29          | (6.83, 7.74) | 78  | 7.56          | (7.12, 7.99) | 87  |                                                                    |                      |                   |
| 24 months                                            | 7.86          | (7.40, 8.31) | 78  | 8.07          | (7.64, 8.51) | 86  |                                                                    |                      |                   |
| <i>Pre-diabetes at baseline</i>                      | Usual Care    |              |     | CPAP          |              |     |                                                                    | <i>P-value</i>       |                   |
|                                                      | Mean (95% CI) |              | n   | Mean (95% CI) |              | n   |                                                                    | Treatment allocation | Treatment * visit |
| Baseline                                             | 5.72          | (5.51, 5.93) | 138 | 5.72          | (5.51, 5.91) | 145 | -0.085<br>(-0.252, 0.082)                                          | 0.318                | 0.506             |
| 6 months                                             | 5.87          | (5.66, 6.08) | 138 | 5.65          | (5.44, 5.85) | 145 |                                                                    |                      |                   |
| 24 months                                            | 5.79          | (5.58, 5.99) | 137 | 5.77          | (5.57, 5.97) | 143 |                                                                    |                      |                   |
| <i>Neither diabetes nor pre-diabetes at baseline</i> | Usual Care    |              |     | CPAP          |              |     |                                                                    | <i>P-value</i>       |                   |
|                                                      | Mean (95% CI) |              | n   | Mean (95% CI) |              | n   |                                                                    | Treatment allocation | Treatment * visit |
| Baseline                                             | 4.91          | (4.73, 5.10) | 31  | 4.95          | (4.76, 5.13) | 33  | -0.128<br>(-0.281, 0.024)                                          | 0.098                | 0.042             |
| 6 months                                             | 5.24          | (5.05, 5.43) | 30  | 5.23          | (5.05, 5.41) | 33  |                                                                    |                      |                   |
| 24 months                                            | 5.45          | (5.26, 5.64) | 30  | 5.05          | (4.86, 5.23) | 33  |                                                                    |                      |                   |

Stratified by diabetes/pre-diabetes status at baseline and adjusted for baseline measure of variable of interest (estimated marginal means, confidence intervals and significance from linear mixed models).

**Supplementary Table S3b:** Fasting serum HbA<sub>1c</sub> according to treatment allocation. Only participants who had fasting blood collected at all three time points: baseline, 6 and 24 months.

| <i>Known diabetes at baseline</i>                    | Usual Care    |              |     | CPAP          |              |     | <i>Adjusted mean difference<br/>CPAP – Usual<br/>Care (95% CI)</i> | <i>P-value</i>       |                   |
|------------------------------------------------------|---------------|--------------|-----|---------------|--------------|-----|--------------------------------------------------------------------|----------------------|-------------------|
|                                                      | Mean          | 95% CI       | n   | Mean          | 95% CI       | n   |                                                                    | Treatment allocation | Treatment * visit |
| Baseline                                             | 7.30          | (7.10, 7.49) | 78  | 7.26          | (7.08, 7.44) | 87  | 0.042<br>(-0.114, 0.197)                                           | 0.601                | 0.663             |
| 6 months                                             | 7.07          | (6.88, 7.27) | 78  | 7.21          | (7.03, 7.39) | 87  |                                                                    |                      |                   |
| 24 months                                            | 7.28          | (7.09, 7.48) | 78  | 7.31          | (7.13, 7.50) | 86  |                                                                    |                      |                   |
| <i>Pre-diabetes at baseline</i>                      | Usual Care    |              |     | CPAP          |              |     |                                                                    | <i>P-value</i>       |                   |
|                                                      | Mean (95% CI) |              | n   | Mean (95% CI) |              | n   |                                                                    | Treatment allocation | Treatment * visit |
| Baseline                                             | 6.02          | (5.93, 6.10) | 138 | 6.02          | (5.94, 6.10) | 144 | -0.020<br>(-0.087, 0.046)                                          | 0.549                | 0.497             |
| 6 months                                             | 6.07          | (5.98, 6.15) | 137 | 5.99          | (5.91, 6.07) | 141 |                                                                    |                      |                   |
| 24 months                                            | 6.02          | (5.94, 6.10) | 138 | 6.03          | (5.95, 6.11) | 143 |                                                                    |                      |                   |
| <i>Neither diabetes nor pre-diabetes at baseline</i> | Usual Care    |              |     | CPAP          |              |     |                                                                    | <i>P-value</i>       |                   |
|                                                      | Mean (95% CI) |              | n   | Mean (95% CI) |              | n   |                                                                    | Treatment allocation | Treatment * visit |
| Baseline                                             | 5.34          | (5.23, 5.45) | 29  | 5.36          | (5.25, 5.47) | 32  | -0.005<br>(-0.094, 0.084)                                          | 0.911                | 0.406             |
| 6 months                                             | 5.57          | (5.45, 5.68) | 29  | 5.48          | (5.37, 5.58) | 32  |                                                                    |                      |                   |
| 24 months                                            | 5.45          | (5.34, 5.56) | 29  | 5.50          | (5.40, 5.61) | 31  |                                                                    |                      |                   |

Stratified by diabetes status at baseline and adjusted for baseline measure of variable of interest (estimated marginal means and significance from linear mixed models).

**Supplementary Table S4:** Assessment of differential effect of CPAP intervention according to baseline OSA disease severity, measured either by ODI or ESS.

| Dependent variable: | Base model* plus: | Known diabetes at baseline |         |        |       | Pre-diabetes at baseline |         |        |       | Neither diabetes nor pre-diabetes at baseline |         |        |       |
|---------------------|-------------------|----------------------------|---------|--------|-------|--------------------------|---------|--------|-------|-----------------------------------------------|---------|--------|-------|
|                     |                   | Estimate of fixed effect   | 95% CI  |        | P     | Estimate of fixed effect | 95% CI  |        | P     | Estimate of fixed effect                      | 95% CI  |        | P     |
| Glucose             | ODI               | 0.0071                     | -0.0109 | 0.0251 | 0.440 | 0.0083                   | 0.0026  | 0.0141 | 0.004 | 0.0006                                        | -0.0063 | 0.0075 | 0.866 |
|                     | Treatment*ODI     | -0.0110                    | -0.0361 | 0.0141 | 0.391 | -0.0062                  | -0.0146 | 0.0022 | 0.145 | 0.0017                                        | -0.0075 | 0.0108 | 0.722 |
|                     | ESS               | -0.0105                    | -0.0712 | 0.0501 | 0.733 | 0.0085                   | -0.0142 | 0.0313 | 0.462 | 0.0062                                        | -0.0161 | 0.0285 | 0.585 |
|                     | Treatment*ESS     | 0.0596                     | -0.0242 | 0.1433 | 0.163 | -0.0140                  | -0.0473 | 0.0194 | 0.412 | -0.0112                                       | -0.0431 | 0.0208 | 0.492 |
| HbA1c               | ODI               | 0.0022                     | -0.0057 | 0.0100 | 0.589 | 0.0015                   | -0.0012 | 0.0042 | 0.275 | 0.0001                                        | -0.0042 | 0.0043 | 0.970 |
|                     | Treatment*ODI     | -0.0053                    | -0.0162 | 0.0056 | 0.342 | -0.0003                  | -0.0044 | 0.0037 | 0.879 | 0.0038                                        | -0.0017 | 0.0093 | 0.174 |
|                     | ESS               | -0.0141                    | -0.0402 | 0.0120 | 0.288 | 0.0011                   | -0.0098 | 0.0120 | 0.843 | -0.0009                                       | -0.0143 | 0.0124 | 0.889 |
|                     | Treatment*ESS     | 0.0405                     | 0.0046  | 0.0765 | 0.027 | 0.0095                   | -0.0066 | 0.0256 | 0.248 | -0.0092                                       | -0.0285 | 0.0102 | 0.353 |

\*Base model includes: intercept, treatment allocation (CPAP or Usual Care), timepoint, baseline value of glucose or HbA1c respectively, and the interaction term treatment\*timepoint.
